# Supplementary material for: Healthcare worker perceptions of the implementation context surrounding an infection prevention intervention in a Zambian neonatal intensive care unit
Source: Springer Nature journal article supplement (doi:10.1186/s12887-020-02323-2), 2020-09-10
Supplement: MOESM1 [file 18366742]

## **Interview Guide**

### **Introduction/Warm Up Questions**

- 1.) What is your job title?
- 2.) How long have you worked at this hospital?
- 3.) What is your background education and training in?
- 4.) What are your primary responsibilities? What types of tasks do you do each day?
- 5.) What are your biggest day to day stresses at work?

### **Nosocomial Bacteremia – General**

- 1.) What are your thoughts about the reasons why NICU patients get bloodstream infections while getting care at this hospital?
- 2.) Do you think bloodstream infections in the NICU can be prevented? If yes, how? If no, can you explain why you think that?
- 3.) What gets in the way of preventing hospital-acquired bloodstream infections in the NICU?
- 4.) What helps you prevent hospital-acquired bloodstream infections in the NICU?

### **Nosocomial Bacteremia Prevention**

#### *Hand Hygiene*

- 1.) How important do you think hand washing is to prevent infection in the NICU?
- 2.) When do you think one should wash their hands when performing patient care?
- 3.) What gets in the way of proper hand washing in the NICU?
- 4.) What helps people to wash their hands properly in the NICU?
- 5.) What are your opinions about the alcohol hand rub that was implemented in the NICU?

#### *CHG Bathing*

- 1.) How important do you think bathing patients is to prevent bloodstream infections in the NICU?
- 2.) What gets in the way of bathing patients in the NICU?

- 3.) What helps patients get bathed in the NICU?
- 4.) What are your opinions about the CHG bathing protocol that was implemented in the NICU?

*Text Message Reminders*

- 1.) What is your opinion about the text message/SMS reminders with infection control practices that were implemented to help reduce bloodstream infections?
  - a. How well do you think they worked?
  - b. Did you read them?
  - c. Did you follow the advice contained within them?
  - d. What do you think could be done to make them more interesting?
